# Supplementary material for: Surface functionalization of MIL-101(Cr) by aminated mesoporous silica and improved adsorption selectivity toward special metal ions
Source: Royal Society of Chemistry journal article supplement (doi:10.1039/c9dt00501c), 2019-01-01
Supplement: c9dt00501c1.pdf [file c9dt00501c1.pdf]

**Surface functionalization of MIL-101(Cr) by aminated mesoporous silica  
and improved adsorption selectivity toward special metal ions**

Xueping Quan<sup>†</sup>, Zhongqiao Sun<sup>†</sup>, Hao Meng<sup>\*</sup>, Yide Han, Junbiao Wu, Junli Xu, Yan Xu  
and Xia Zhang<sup>\*</sup>

*Department of Chemistry, College of Sciences, Northeastern University, Shenyang  
110819, China.*

---

<sup>†</sup> These authors contributed equally to this work.

<sup>\*</sup>Corresponding authors.

E-mail: 3796477@qq.com (H. Meng), xzhang@mail.neu.edu.cn.(X. Zhang)

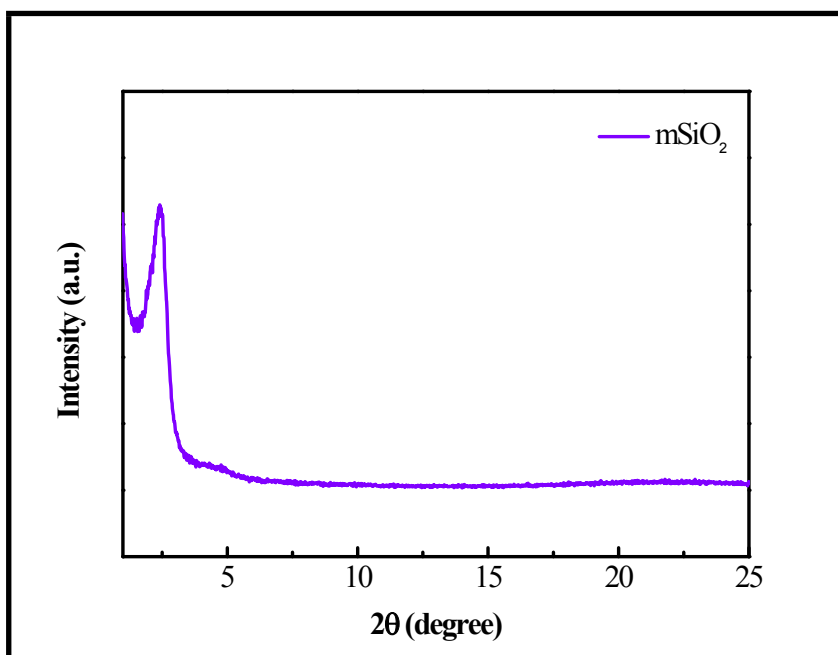

Fig. S1 XRD pattern of mesoporous SiO<sub>2</sub>.

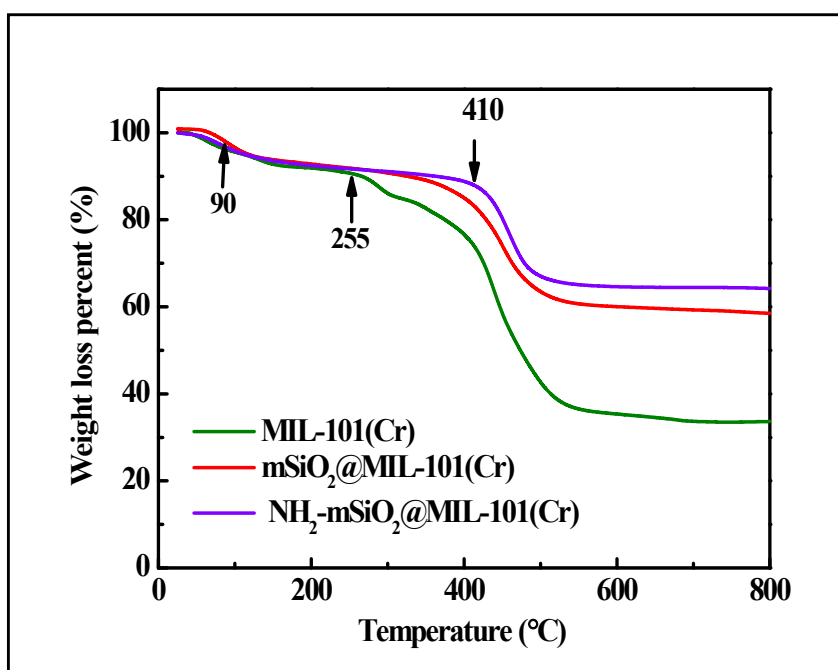

Fig. S2 TG curves of MIL-101(Cr) , mSiO<sub>2</sub>@MIL-101(Cr) and NH<sub>2</sub>-mSiO<sub>2</sub>@MIL-101(Cr) .

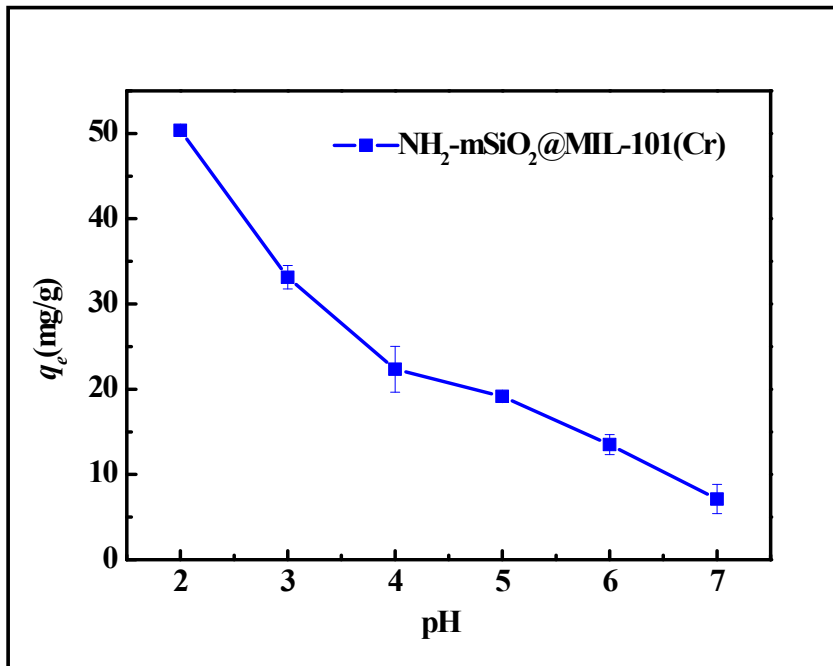

Fig. S3 Effect of pH conditions on the adsorption of Cr(VI) on NH<sub>2</sub>-mSiO<sub>2</sub>@MIL-101(Cr)

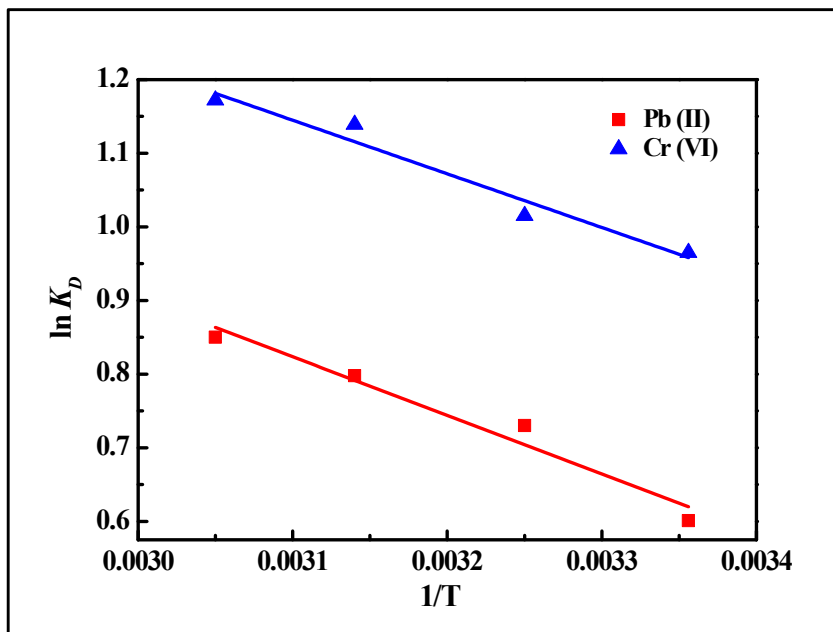

Fig. S4 Plots curves of  $\ln K_D$  versus  $1/T$  based on the adsorption data of Pb(II) and Cr(VI) on NH<sub>2</sub>-mSiO<sub>2</sub>@MIL-101(Cr) at different temperature.

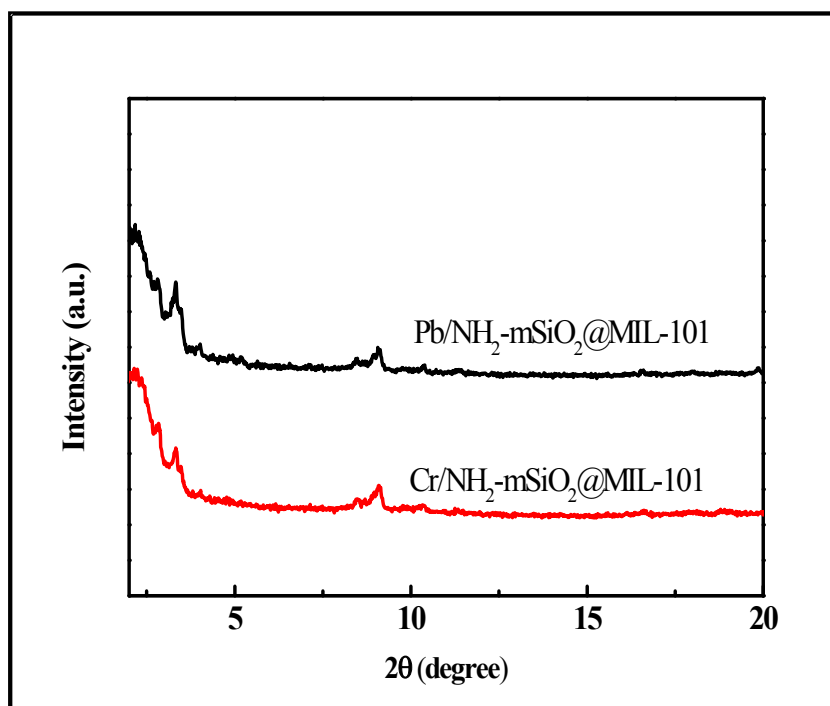

Fig. S5 XRD patterns of NH<sub>2</sub>-mSiO<sub>2</sub>@MIL-101 after the adsorption of Pb(II) and Cr(VI).

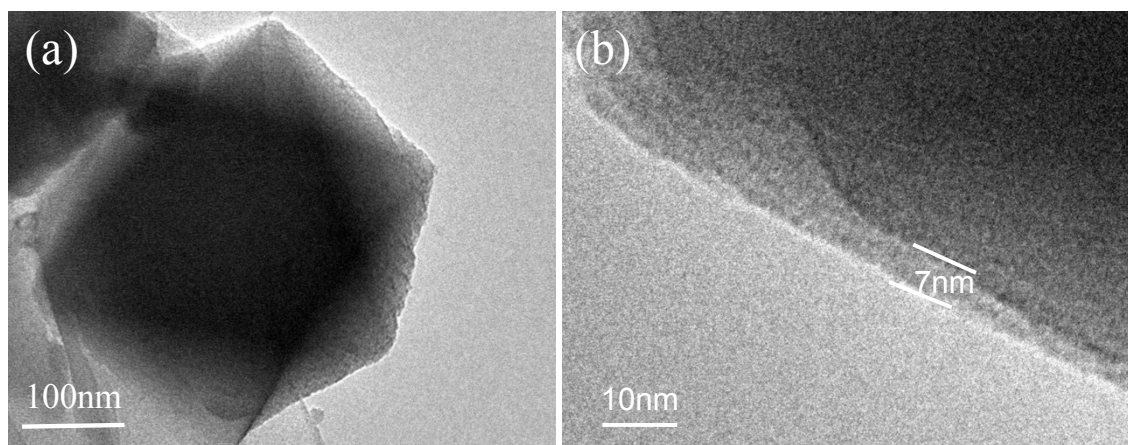

Fig. S6 TEM images of NH<sub>2</sub>-mSiO<sub>2</sub>@MIL-101(Cr) after the adsorption of Pb(II) under different magnification.

Table S1 The calculated BET surface area, pore volume and pore size of original MIL-101(Cr) and functionalized MIL-101(Cr)

| Samples                                     | BET surface area ( $\text{m}^2 \text{g}^{-1}$ ) | Pore volume ( $\text{cm}^3 \text{g}^{-1}$ ) | $d_p$ (nm) |
|---------------------------------------------|-------------------------------------------------|---------------------------------------------|------------|
| MIL-101                                     | 3564.4                                          | 2.4                                         | 1.21       |
| mSiO <sub>2</sub> @MIL-101                  | 1046.6                                          | 0.74                                        | 1.21       |
| NH <sub>2</sub> -mSiO <sub>2</sub> @MIL-101 | 928.2                                           | 0.63                                        | 1.21       |
